# Supplementary material for: Machine-Learning-Based Genome-Wide Association Studies for Uncovering QTL Underlying Soybean Yield and Its Components
Source: MDPI journal article supplement (doi:10.3390/ijms23105538), 2022-05-16
Supplement: s1 [file s1]

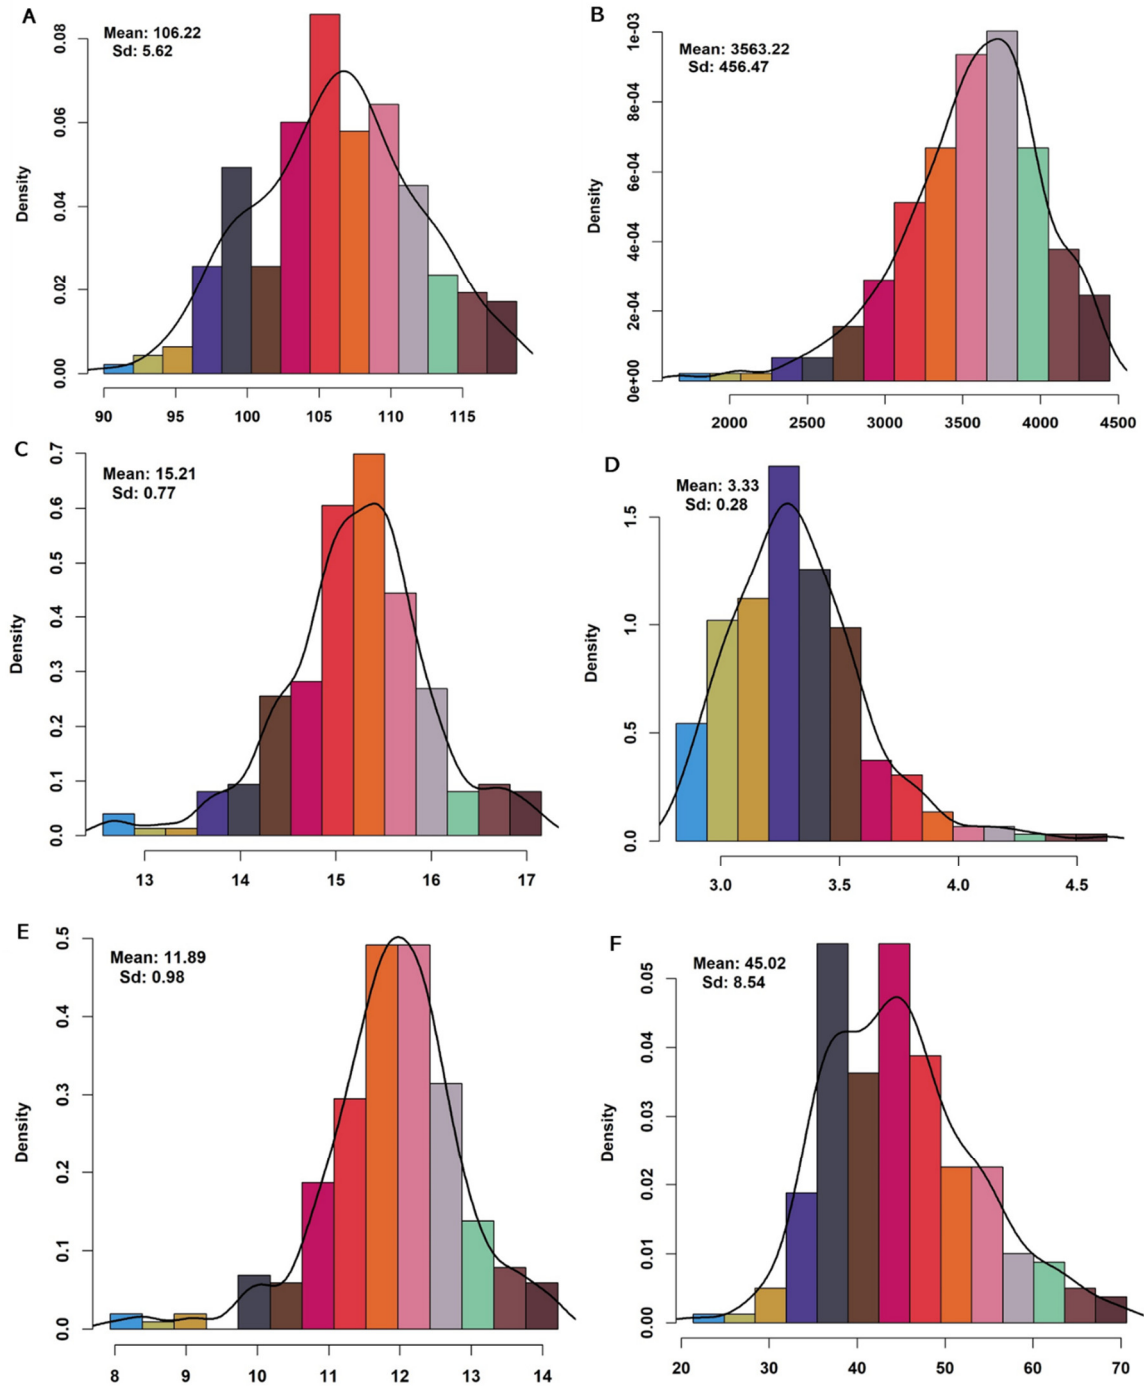

**Figure S1.** The phenotypic distribution among the soybean (A) maturity, (B) seed yield, (C) The total nodes per plant, (D) The total number of non-reproductive nodes per plant, (E) Total number of reproductive nodes per plant, and (F) The total number of pods per plant.

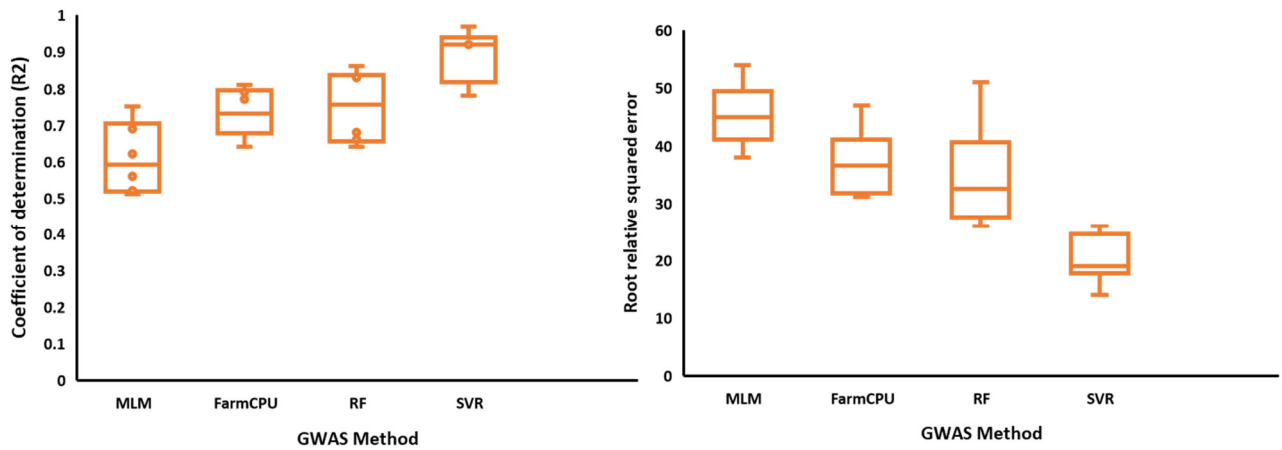

**Figure S2.** The average coefficient of determination ( $R^2$ ) and root relative squared error of the tested GWAS algorithms. MLM: Mixed Linear Model, FarmCPU: Fixed and random model circulating probability unification, RF: Random Forest, SVR: Support Vector Regression.

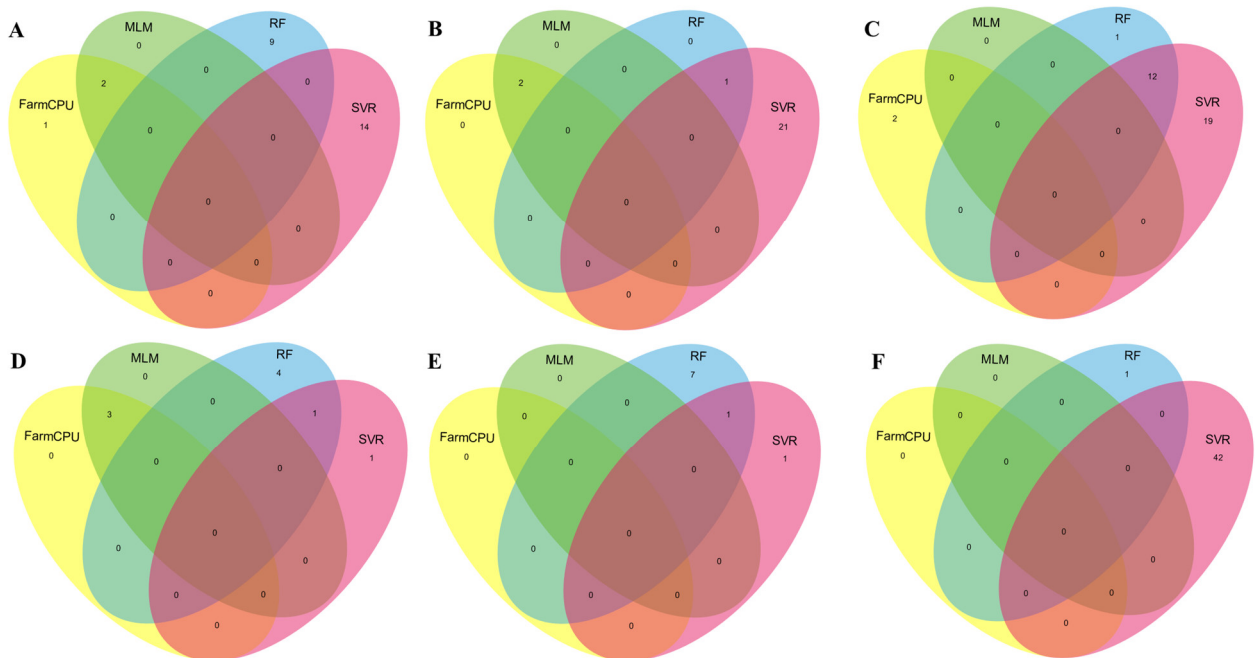

**Figure S3.** Venn diagram of the MTAs colocalized with previously reported QTL for A) maturity, B) seed yield, C) the total number of nodes (NP), D) the total number of non-reproductive nodes (NRNP), E) The total number of reproductive nodes (RNP), and F) the total number of pods (PP) in soybean using MLM, FarmCPU, RF, and SVR methods.

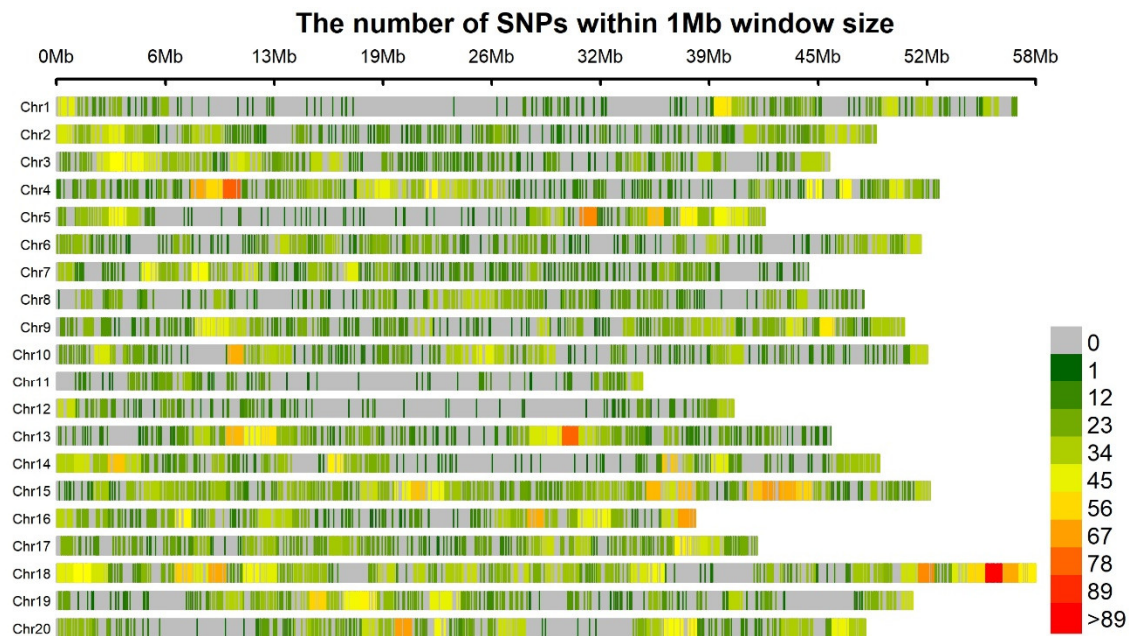

**Figure S4.** The distribution of SNP markers across the chromosomes of the tested soybean population.

**Table S1.** The full list of detected MTAs for Maturity using MLM and FarmCPU in the tested soybean population.

| GWAS Method | Chromosome | SNP position | Effect   | Standard error |
|-------------|------------|--------------|----------|----------------|
| MLM         | 2          | 2149517      | 1.792505 | 0.482867668    |
|             | 2          | 2212910      | 1.762641 | 0.460495755    |
|             | 2          | 8233734      | 2.927005 | 0.747248066    |
|             | 2          | 8233766      | 3.10312  | 0.734120715    |
|             | 2          | 8233782      | 3.139172 | 0.730754331    |
|             | 2          | 8233798      | 2.926092 | 0.727978299    |
|             | 2          | 8233807      | 2.933142 | 0.726771594    |
|             | 19         | 9764650      | -3.15265 | 0.849670161    |
|             | 19         | 9768960      | -3.72545 | 0.982059376    |
|             | 2          | 2212910      | 1.605745 | 0.430457289    |
| FarmCPU     | 2          | 8233734      | 2.927764 | 0.718733406    |
|             | 2          | 8233766      | 3.147648 | 0.703161392    |
|             | 2          | 8233782      | 3.179466 | 0.700306634    |
|             | 2          | 8233798      | 2.961624 | 0.70149717     |
|             | 2          | 8233807      | 2.964826 | 0.700088857    |
|             | 19         | 9764650      | -3.01872 | 0.764478613    |
|             | 19         | 9768960      | -3.62338 | 0.900049558    |
|             | 20         | 37765851     | -1.4674  | 0.39993614     |

MLM: Mixed Linear Model, FarmCPU: Fixed and random model circulating probability unification.

**Table S2.** The full list of detected MTAs for Maturity using RF and SVR in the tested soybean population.

| GWAS Method | Chromosome | SNP position | Effect (Scaled) |
|-------------|------------|--------------|-----------------|
| RF          | 3          | 2978272      | 70.54           |
|             | 16         | 5730281      | 82.82           |
|             | 17         | 34757372     | 68.97           |
|             | 2          | 695362       | 76.83           |
|             | 2          | 720134       | 77.85           |
|             | 2          | 827374       | 78.83           |
|             | 6          | 36519422     | 81.03           |
|             | 6          | 50533683     | 85.63           |
| SVR         | 10         | 1595239      | 74.58           |
|             | 10         | 1689395      | 75.86           |
|             | 16         | 2438652      | 78.28           |
|             | 16         | 2460921      | 81.72           |
|             | 19         | 47513536     | 82.38           |
|             | 19         | 47513572     | 78.19           |
|             | 20         | 26583677     | 76.73           |

RF: Random Forest, SVR: Support Vector Regression.

**Table S3.** The full list of detected MTAs for yield using MLM and FarmCPU in the tested soybean population.

| GWAS Method | Chromosome | SNP position | Effect   | Standard error |
|-------------|------------|--------------|----------|----------------|
| MLM         | 5          | 34391386     | -238.185 | 64.54998       |
|             | 8          | 4816348      | -176.858 | 44.94951       |
| FarmCPU     | 5          | 34391386     | -239.728 | 61.54473       |
|             | 8          | 4816348      | -175.152 | 43.02462       |
|             | 8          | 5005929      | -146.799 | 39.59137       |

MLM: Mixed Linear Model, FarmCPU: Fixed and random model circulating probability unification.

**Table S4.** The full list of detected MTAs for yield using RF and SVR in the tested soybean population.

| GWAS Method | Chromosome | SNP position | Effect (Scaled) |
|-------------|------------|--------------|-----------------|
| RF          | 4          | 18112413     | 86.35634        |
|             | 7          | 112199       | 86.752          |
|             | 7          | 1032587      | 78.2727         |
|             | 12         | 31320419     | 91.24594        |
|             | 17         | 30546684     | 91.46945        |
|             | 3          | 36309302     | 75.44121        |
|             | 3          | 37617293     | 80.83272        |
|             | 4          | 14417068     | 87.52           |
|             | 4          | 14417041     | 86.52           |
|             | 6          | 28260007     | 89.53514        |
|             | 6          | 28737884     | 84.21403        |
|             | 7          | 44488152     | 86.83114        |
| SVR         | 7          | 37469678     | 86.65           |
|             | 7          | 44171678     | 87.91655        |
|             | 7          | 1032587      | 83.25           |
|             | 15         | 34958361     | 79.4872         |
|             | 15         | 35051401     | 78.00557        |
|             | 15         | 35019563     | 77.4397         |
|             | 15         | 19561019     | 86.65           |
|             | 19         | 41385139     | 86.47878        |
|             | 19         | 18416729     | 81.254          |
|             | 19         | 18394576     | 76.58           |
|             | 20         | 1011439      | 86.52           |

RF: Random Forest, SVR: Support Vector Regression.

**Table S5.** The full list of detected MTAs for the total number of nodes per plant (NP) using MLM and FarmCPU in the tested soybean population.

| GWAS Method | Chromosome | SNP position | Effect   | Standard error |
|-------------|------------|--------------|----------|----------------|
| MLM         | 8          | 4816348      | -0.28714 | 0.076246       |
|             | 8          | 4816348      | -0.2829  | 0.073228       |
| FarmCPU     | 19         | 40131952     | 0.20595  | 0.055894       |

MLM: Mixed Linear Model, FarmCPU: Fixed and random model circulating probability unification.

**Table S6.** The full list of detected MTAs for the total number of nodes per plant (NP) using RF and SVR in the tested soybean population.

| GWAS Method | Chromosome | SNP position | Effect (Scaled) |
|-------------|------------|--------------|-----------------|
| RF          | 2          | 2197493      | 88.45829        |
|             | 3          | 1258563      | 75.5856         |
|             | 4          | 1205787      | 89.54549        |
|             | 6          | 50570624     | 91              |
|             | 6          | 50570473     | 86.18383        |
|             | 6          | 50570624     | 81.98907        |
|             | 6          | 50570473     | 87.82022        |
|             | 7          | 1032587      | 91.48282        |
|             | 7          | 37469678     | 91.48282        |
|             | 7          | 1092403      | 83.0578         |
| SVR         | 10         | 13358967     | 83.0578         |
|             | 18         | 55645699     | 85.94209        |
|             | 18         | 55575915     | 83.22552        |
|             | 19         | 47350110     | 87.55776        |
|             | 20         | 1011439      | 91.48282        |

RF: Random Forest, SVR: Support Vector Regression.

**Table S7.** The full list of detected MTAs for the total number of non-reproductive nodes per plant (NRNP) using MLM and FarmCPU in the tested soybean population.

| GWAS Method | Chromosome | SNP position | Effect   | Standard error |
|-------------|------------|--------------|----------|----------------|
| MLM         | 8          | 5005929      | 0.096527 | 0.025972       |
|             | 15         | 10193796     | -0.16419 | 0.044716       |
|             | 4          | 44411975     | 0.114507 | 0.030975       |
| FarmCPU     | 8          | 5005929      | 0.093006 | 0.02481        |
|             | 15         | 10193796     | -0.15776 | 0.041557       |

MLM: Mixed Linear Model, FarmCPU: Fixed and random model circulating probability unification.

**Table S8.** The full list of detected MTAs for the total number of non-reproductive nodes per plant (NRNP) using RF and SVR in the tested soybean population.

| GWAS Method | Chromosome | SNP position | Effect (Scaled) |
|-------------|------------|--------------|-----------------|
| RF          | 1          | 54647498     | 97.08628        |
|             | 4          | 42376190     | 86.22046        |
|             | 7          | 329800       | 86.52974        |
|             | 18         | 12945778     | 95.54654        |
|             | 19         | 40218800     | 97.80343        |
|             | 4          | 14417068     | 95.35466        |
|             | 4          | 14417041     | 94.35569        |
|             | 7          | 37469678     | 95.54566        |
|             | 7          | 1032587      | 93.5545         |
|             | 18         | 19561019     | 94.34565        |
| SVR         | 19         | 40218800     | 94.07644        |
|             | 19         | 18394576     | 93.95336        |
|             | 19         | 30246923     | 89.76548        |
|             | 19         | 18416729     | 89.34677        |
|             | 20         | 1011439      | 88.54757        |

RF: Random Forest, SVR: Support Vector Regression.

**Table S9.** The full list of detected MTAs for the total number of reproductive nodes per plant (RNP) using MLM and FarmCPU in the tested soybean population.

| GWAS Method | Chromosome | SNP position | Effect   | Standard error |
|-------------|------------|--------------|----------|----------------|
| MLM         | 8          | 4816348      | -0.39027 | 0.097085       |
|             | 8          | 5005929      | -0.34216 | 0.088764       |
|             | 8          | 5063716      | -0.34861 | 0.091533       |
|             | 19         | 40131952     | 0.283253 | 0.075555       |
| FarmCPU     | 8          | 4816348      | -0.37988 | 0.092245       |
|             | 8          | 5005929      | -0.33022 | 0.08469        |
|             | 8          | 5063716      | -0.33343 | 0.087509       |
|             | 19         | 40131952     | 0.273209 | 0.070496       |

MLM: Mixed Linear Model, FarmCPU: Fixed and random model circulating probability unification.

**Table S10.** The full list of detected MTAs for the total number of reproductive nodes per plant (RNP) using RF and SVR in the tested soybean population.

| GWAS Method | Chromosome | SNP position | Effect (Scaled) |
|-------------|------------|--------------|-----------------|
| RF          | 8          | 46239110     | 78.54654        |
|             | 9          | 40285014     | 61.84272        |
|             | 15         | 34958361     | 55.89821        |
|             | 20         | 26567069     | 33.38569        |
|             | 4          | 14417041     | 98.76576        |
|             | 4          | 14417068     | 97.43655        |
|             | 7          | 37469678     | 97.23576        |
|             | 7          | 1032587      | 96.65465        |
| SVR         | 8          | 46239110     | 97.14433        |
|             | 15         | 34958361     | 94.44051        |
|             | 18         | 19561019     | 97.54655        |
|             | 19         | 30246923     | 98.54655        |
|             | 19         | 18416729     | 98.75676        |
|             | 19         | 18394576     | 97.54578        |
|             | 20         | 1011439      | 98.23478        |

RF: Random Forest, SVR: Support Vector Regression.

**Table S11.** The full list of detected MTAs for the total number of pods per plant (PP) using RF and SVR in the tested soybean population.

| GWAS Method | Chromosome | SNP position | Effect (Scaled) |
|-------------|------------|--------------|-----------------|
| RF          | 7          | 15331676     | 87.0475         |
|             | 10         | 27244270     | 100             |
|             | 18         | 42300695     | 75.49254        |
|             | 20         | 47642298     | 84.81901        |
|             | 6          | 28737884     | 87.21842        |
|             | 9          | 39366957     | 88.02327        |
|             | 9          | 39372117     | 88.02327        |
|             | 10         | 49302884     | 89.10978        |
| SVR         | 11         | 5245870      | 88.83899        |
|             | 15         | 37810860     | 86.3949         |
|             | 18         | 55645699     | 92.90795        |
|             | 18         | 55469601     | 91.78526        |
|             | 19         | 47235604     | 86.00507        |
|             | 19         | 47350110     | 85.79695        |
|             | 19         | 47224293     | 87.52014        |
|             | 19         | 43077182     | 89.04024        |

RF: Random Forest, SVR: Support Vector Regression.
